# Supplementary material for: Reduction of NADPH-Oxidase Activity Ameliorates the Cardiovascular Phenotype in a Mouse Model of Williams-Beuren Syndrome
Source: PubMed Central journal article supplement (PMC3271062; doi:10.1371/journal.pgen.1002458), 2012-02-02
Supplement: pgen.1002458.s003.pdf [file pgen.1002458.s003.pdf]

**Table S1: Blood pressure measurements at 16 weeks of age (N=7-12)**

**SYSTOLIC BLOOD PRESSURE**

| Genotype          | Intervention | SYS-mean | SD    | <i>P vs WT-NT</i> | <i>P vs DD-NT</i> |
|-------------------|--------------|----------|-------|-------------------|-------------------|
| WT                | NT           | 114.58   | 7.68  |                   |                   |
| WT                | LP           | 104.90   | 3.59  | 1.000             |                   |
| WT                | AP           | 103.11   | 8.76  | 1.000             |                   |
| WT                | LN           | 105.40   | 11.97 | 1.000             |                   |
| WT                | AN           | 103.72   | 8.62  | 1.000             |                   |
| DD                | NT           | 151.43   | 12.64 | <b>0.000</b>      |                   |
| DD                | LP           | 109.88   | 12.77 | 1.000             | <b>0.000</b>      |
| DD                | AP           | 120.23   | 12.89 | 1.000             | <b>0.001</b>      |
| DD                | LN           | 113.23   | 16.03 | 1.000             | <b>0.002</b>      |
| DD                | AN           | 120.23   | 7.93  | 0.752             | <b>0.008</b>      |
| DD/ <i>Ncf1</i> - | NT           | 121.83   | 9.33  | 0.805             | <b>0.000</b>      |
| DD/ <i>Ncf1</i> - | LP           | 112.07   | 10.35 | 1.000             | <b>0.000</b>      |
| DD/ <i>Ncf1</i> - | AP           | 115.31   | 10.65 | 1.000             | <b>0.000</b>      |
| DD/ <i>Ncf1</i> - | LN           | 113.26   | 20.32 | 1.000             | <b>0.001</b>      |
| DD/ <i>Ncf1</i> - | AN           | 116.84   | 5.99  | 1.000             | <b>0.000</b>      |

**DIASTOLIC BLOOD PRESSURE**

| Genotype          | Intervention | DIAS-mean | SD    | <i>P vs WT-NT</i> | <i>P vs DD-NT</i> |
|-------------------|--------------|-----------|-------|-------------------|-------------------|
| WT                | NT           | 87.80     | 8.89  |                   |                   |
| WT                | LP           | 85.60     | 5.23  | 1.000             |                   |
| WT                | LN           | 85.30     | 8.03  | 1.000             |                   |
| WT                | AP           | 81.85     | 6.70  | 1.000             |                   |
| WT                | AN           | 81.63     | 6.47  | 1.000             |                   |
| DD                | NT           | 129.53    | 10.08 | <b>0.000</b>      |                   |
| DD                | LP           | 93.18     | 10.84 | 1.000             | <b>0.001</b>      |
| DD                | LN           | 90.57     | 14.16 | 1.000             | <b>0.000</b>      |
| DD                | AP           | 95.83     | 12.35 | 0.636             | <b>0.000</b>      |
| DD                | AN           | 97.20     | 10.71 | 0.481             | <b>0.002</b>      |
| DD/ <i>Ncf1</i> - | NT           | 93.54     | 8.67  | 0.974             | <b>0.000</b>      |
| DD/ <i>Ncf1</i> - | LP           | 86.69     | 9.18  | 1.000             | <b>0.000</b>      |
| DD/ <i>Ncf1</i> - | LN           | 90.27     | 11.72 | 1.000             | <b>0.000</b>      |
| DD/ <i>Ncf1</i> - | AP           | 90.00     | 8.77  | 1.000             | <b>0.000</b>      |
| DD/ <i>Ncf1</i> - | AN           | 95.64     | 8.85  | 0.575             | <b>0.000</b>      |

**MEAN BLOOD PRESSURE**

| Genotype | Intervention | MEAN-mean | s.e.m. | <i>P vs WT-NT</i> | <i>P vs DD-NT</i> |
|----------|--------------|-----------|--------|-------------------|-------------------|
| WT       | NT           | 96.18     | 8.08   |                   |                   |
| WT       | LP           | 90.75     | 3.69   | 1.000             |                   |
| WT       | LN           | 92.15     | 8.52   | 1.000             |                   |
| WT       | AP           | 89.22     | 7.39   | 1.000             |                   |
| WT       | AN           | 88.70     | 6.85   | 1.000             |                   |
| DD       | NT           | 135.94    | 10.78  | <b>0.000</b>      |                   |
| DD       | LP           | 97.56     | 11.57  | 1.000             | <b>0.000</b>      |
| DD       | LN           | 98.10     | 13.47  | 1.000             | <b>0.000</b>      |
| DD       | AP           | 103.50    | 11.70  | 0.705             | <b>0.000</b>      |

**Table S1: Blood pressure measurements at 16 weeks of age (N=7-12)**

|                   |    |        |       |       |              |
|-------------------|----|--------|-------|-------|--------------|
| DD                | AN | 104.61 | 9.62  | 0.466 | <b>0.003</b> |
| DD/ <i>Ncf1</i> - | NT | 101.09 | 7.57  | 0.654 | <b>0.000</b> |
| DD/ <i>Ncf1</i> - | LP | 94.67  | 8.41  | 1.000 | <b>0.000</b> |
| DD/ <i>Ncf1</i> - | LN | 98.01  | 14.22 | 1.000 | <b>0.000</b> |
| DD/ <i>Ncf1</i> - | AP | 98.16  | 9.18  | 1.000 | <b>0.000</b> |
| DD/ <i>Ncf1</i> - | AN | 102.54 | 7.55  | 0.466 | <b>0.000</b> |
