# Supplementary material for: Reduction of NADPH-Oxidase Activity Ameliorates the Cardiovascular Phenotype in a Mouse Model of Williams-Beuren Syndrome
Source: PubMed Central journal article supplement (PMC3271062; doi:10.1371/journal.pgen.1002458), 2012-02-02
Supplement: pgen.1002458.s004.pdf [file pgen.1002458.s004.pdf]

**Table S2: Mean blood pressure at 8 and 32 weeks of age**

**8 weeks (N=7-12)**

| Genotype          | Intervention | Mean   | SD   | <i>P vs WT-NT</i> | <i>P vs DD-NT</i> |
|-------------------|--------------|--------|------|-------------------|-------------------|
| WT                | NT           | 91.08  | 8.99 |                   |                   |
| WT                | LP           | 78.25  | 5.91 | 0.088             |                   |
| WT                | AP           | 89.94  | 8.45 | 1.000             |                   |
| DD                | NT           | 126.13 | 9.51 | <b>0.000</b>      |                   |
| DD                | LP           | 100.90 | 9.10 | 0.225             | <b>0.000</b>      |
| DD                | AP           | 106.78 | 6.01 | <b>0.036</b>      | <b>0.001</b>      |
| DD/ <i>Ncf1</i> - | NT           | 106.07 | 9.77 | <b>0.001</b>      | <b>0.000</b>      |
| DD/ <i>Ncf1</i> - | LP           | 98.00  | 9.54 | 0.371             | <b>0.000</b>      |
| DD/ <i>Ncf1</i> - | AP           | 98.87  | 6.81 | 0.260             | <b>0.000</b>      |

**32 weeks (N=3-7)**

| Genotype          | Intervention | Mean   | SD    | <i>P vs WT-NT</i> | <i>P vs DD-NT</i> |
|-------------------|--------------|--------|-------|-------------------|-------------------|
| WT                | NT           | 93.71  | 6.58  |                   |                   |
| WT                | LP           | 81.06  | 1.88  | <b>0.013</b>      |                   |
| WT                | LN           | 91.36  | 6.81  | 1.000             |                   |
| WT                | AP           | 95.84  | 7.95  | 1.000             |                   |
| WT                | AN           | 87.30  | 1.65  | 0.595             |                   |
| DD                | NT           | 138.15 | 15.94 | <b>0.000</b>      |                   |
| DD                | LP           | 93.21  | 15.44 | 1.000             | <b>0.001</b>      |
| DD                | LN           | 102.30 | 3.90  | 0.064             | <b>0.004</b>      |
| DD                | AP           | 101.68 | 13.62 | 0.709             | <b>0.010</b>      |
| DD                | AN           | 101.95 | 6.72  | 0.227             | <b>0.005</b>      |
| DD/ <i>Ncf1</i> - | NT           | 104.67 | 9.88  | 0.109             | <b>0.000</b>      |
| DD/ <i>Ncf1</i> - | LP           | 96.60  | 6.41  | 1.000             | <b>0.000</b>      |
| DD/ <i>Ncf1</i> - | LN           | 91.27  | 7.05  | 1.000             | <b>0.000</b>      |
| DD/ <i>Ncf1</i> - | AP           | 96.03  | 15.45 | 1.000             | <b>0.000</b>      |
| DD/ <i>Ncf1</i> - | AN           | 86.69  | 9.56  | 0.727             | <b>0.000</b>      |
