# Supplementary material for: Reduction of NADPH-Oxidase Activity Ameliorates the Cardiovascular Phenotype in a Mouse Model of Williams-Beuren Syndrome
Source: PubMed Central journal article supplement (PMC3271062; doi:10.1371/journal.pgen.1002458), 2012-02-02
Supplement: pgen.1002458.s005.pdf [file pgen.1002458.s005.pdf]

**Table S3: Histopathology at 16 weeks of age**

**Aortic wall thickness**

| <b>Genotype</b>   | <b>Intervention</b> | <b>Mean</b> | <b>SD</b> | <b><i>P vs WT-NT</i></b> | <b><i>P vs DD-NT</i></b> |
|-------------------|---------------------|-------------|-----------|--------------------------|--------------------------|
| WT                | NT                  | 61.61       | 6.98      |                          |                          |
| WT                | LP                  | 57.84       | 10.17     | 1.000                    |                          |
| WT                | LN                  | 58.88       | 8.44      | 1.000                    |                          |
| WT                | AP                  | 64.91       | 10.34     | 1.000                    |                          |
| WT                | AN                  | 61.50       | 4.44      | 1.000                    |                          |
| DD                | NT                  | 77.61       | 5.70      | <b>0.000</b>             |                          |
| DD                | LP                  | 58.39       | 18.43     | 1.000                    | <b>0.008</b>             |
| DD                | LN                  | 68.02       | 2.19      | 0.376                    | 1.000                    |
| DD                | AP                  | 70.74       | 8.06      | 0.069                    | 1.000                    |
| DD                | AN                  | 72.11       | 8.64      | 0.078                    | 1.000                    |
| DD/ <i>Ncf1</i> - | NT                  | 68.69       | 9.29      | <b>0.035</b>             | <b>0.007</b>             |
| DD/ <i>Ncf1</i> - | LP                  | 62.64       | 10.35     | 1.000                    | <b>0.002</b>             |
| DD/ <i>Ncf1</i> - | LN                  | 68.72       | 5.23      | 0.125                    | <b>0.031</b>             |
| DD/ <i>Ncf1</i> - | AP                  | 63.46       | 3.25      | 1.000                    | <b>0.000</b>             |
| DD/ <i>Ncf1</i> - | AN                  | 65.19       | 10.65     | 1.000                    | <b>0.022</b>             |

**Number of lamellar units**

| <b>Genotype</b>   | <b>Mean</b> | <b>SD</b> | <b><i>P vs WT-NT</i></b> |
|-------------------|-------------|-----------|--------------------------|
| WT                | 7.12        | 0.70      |                          |
| DD                | 8.39        | 1.38      | <b>0.016</b>             |
| DD/ <i>Ncf1</i> - | 7.85        | 1.31      | 0.252                    |

**% Heart weight / Body weight**

| <b>Genotype</b>   | <b>Intervention</b> | <b>Mean</b> | <b>SD</b> | <b><i>P vs WT-NT</i></b> | <b><i>P vs DD-NT</i></b> |
|-------------------|---------------------|-------------|-----------|--------------------------|--------------------------|
| WT                | NT                  | 0.56        | 0.11      |                          |                          |
| WT                | LP                  | 0.52        | 0.07      | 1.000                    |                          |
| WT                | LN                  | 0.46        | 0.07      | 0.913                    |                          |
| WT                | AP                  | 0.60        | 0.09      | 1.000                    |                          |
| WT                | AN                  | 0.54        | 0.11      | 1.000                    |                          |
| DD                | NT                  | 0.89        | 0.11      | <b>0.000</b>             |                          |
| DD                | LP                  | 0.65        | 0.09      | 0.716                    | <b>0.001</b>             |
| DD                | LN                  | 0.54        | 0.04      | 1.000                    | <b>0.000</b>             |
| DD                | AP                  | 0.69        | 0.09      | 0.145                    | <b>0.002</b>             |
| DD                | AN                  | 0.73        | 0.02      | 0.291                    | <b>0.031</b>             |
| DD/ <i>Ncf1</i> - | NT                  | 0.74        | 0.08      | <b>0.046</b>             | <b>0.039</b>             |
| DD/ <i>Ncf1</i> - | LP                  | 0.48        | 0.10      | 0.737                    | <b>0.000</b>             |
| DD/ <i>Ncf1</i> - | LN                  | 0.56        | 0.07      | 1.000                    | <b>0.000</b>             |
| DD/ <i>Ncf1</i> - | AP                  | 0.54        | 0.07      | 1.000                    | <b>0.000</b>             |
| DD/ <i>Ncf1</i> - | AN                  | 0.61        | 0.16      | 1.000                    | <b>0.003</b>             |

**Table S3: Histopathology at 16 weeks of age**

**Cross-sectional area of cardiomyocytes ( $\mu\text{m}^2$ )**

**Left Ventricle (LV)**

| <b>Genotype</b>   | <b>Intervention</b> | <b>Mean</b> | <b>SD</b> | <b><i>P vs WT-NT</i></b> | <b><i>P vs DD-NT</i></b> |
|-------------------|---------------------|-------------|-----------|--------------------------|--------------------------|
| WT                | NT                  | 240.70      | 17.70     |                          |                          |
| WT                | LP                  | 257.65      | 33.47     | 1.000                    |                          |
| WT                | LN                  | 253.04      | 23.61     | 1.000                    |                          |
| WT                | AP                  | 261.95      | 32.80     | 1.000                    |                          |
| WT                | AN                  | 260.32      | 33.78     | 1.000                    |                          |
| DD                | NT                  | 313.52      | 2.12      | <b>0.000</b>             |                          |
| DD                | LP                  | 260.62      | 26.52     | 0.517                    | <b>0.006</b>             |
| DD                | LN                  | 271.63      | 29.57     | 0.080                    | <b>0.046</b>             |
| DD                | AP                  | 267.86      | 23.09     | 0.096                    | <b>0.023</b>             |
| DD                | AN                  | 266.17      | 24.60     | 0.088                    | <b>0.017</b>             |
| DD/ <i>Ncf1</i> - | NT                  | 294.38      | 6.17      | <b>0.000</b>             | <b>0.025</b>             |
| DD/ <i>Ncf1</i> - | LP                  | 246.33      | 26.87     | 1.000                    | <b>0.000</b>             |
| DD/ <i>Ncf1</i> - | LN                  | 261.69      | 15.42     | 0.348                    | <b>0.000</b>             |
| DD/ <i>Ncf1</i> - | AP                  | 269.80      | 18.48     | 0.069                    | <b>0.000</b>             |
| DD/ <i>Ncf1</i> - | AN                  | 261.59      | 9.43      | 0.201                    | <b>0.000</b>             |

**Right Ventricle (RV)**

| <b>Genotype</b>   | <b>Intervention</b> | <b>Mean</b> | <b>SD</b> | <b><i>P vs WT-NT</i></b> | <b><i>P vs DD-NT</i></b> |
|-------------------|---------------------|-------------|-----------|--------------------------|--------------------------|
| WT                | NT                  | 322.08      | 18.04     |                          |                          |
| WT                | LP                  | 315.12      | 25.12     | 1.000                    |                          |
| WT                | LN                  | 327.55      | 27.74     | 1.000                    |                          |
| WT                | AP                  | 326.17      | 21.67     | 1.000                    |                          |
| WT                | AN                  | 309.57      | 17.58     | 1.000                    |                          |
| DD                | NT                  | 433.29      | 20.24     | <b>0.000</b>             |                          |
| DD                | LP                  | 344.02      | 11.22     | 0.247                    | <b>0.000</b>             |
| DD                | LN                  | 340.09      | 35.21     | 0.895                    | <b>0.000</b>             |
| DD                | AP                  | 364.89      | 38.51     | <b>0.031</b>             | <b>0.002</b>             |
| DD                | AN                  | 351.54      | 18.35     | 0.100                    | <b>0.000</b>             |
| DD/ <i>Ncf1</i> - | NT                  | 407.02      | 6.74      | <b>0.000</b>             | <b>0.039</b>             |
| DD/ <i>Ncf1</i> - | LP                  | 331.18      | 28.27     | 1.000                    | <b>0.000</b>             |
| DD/ <i>Ncf1</i> - | LN                  | 327.52      | 30.79     | 1.000                    | <b>0.000</b>             |
| DD/ <i>Ncf1</i> - | AP                  | 337.36      | 10.67     | 0.938                    | <b>0.000</b>             |
| DD/ <i>Ncf1</i> - | AN                  | 330.09      | 27.54     | 1.000                    | <b>0.000</b>             |
