# Supplementary material for: Reduction of NADPH-Oxidase Activity Ameliorates the Cardiovascular Phenotype in a Mouse Model of Williams-Beuren Syndrome
Source: PubMed Central journal article supplement (PMC3271062; doi:10.1371/journal.pgen.1002458), 2012-02-02
Supplement: pgen.1002458.s007.pdf [file pgen.1002458.s007.pdf]

**Table S5: AngII levels in plasma**

| <b>Genotype</b>   | <b>Intervention</b> | <b>Mean</b> | <b>SD</b> | <b><i>P vs WT-NT</i></b> | <b><i>P vs DD-NT</i></b> |
|-------------------|---------------------|-------------|-----------|--------------------------|--------------------------|
| WT                | NT                  | 48.27       | 6.67      |                          |                          |
| WT                | LT                  | 25.30       | 10.32     | 0.000                    |                          |
| WT                | AT                  | 25.88       | 8.17      | 0.000                    |                          |
| DD                | NT                  | 82.24       | 7.39      | <b>0.000</b>             |                          |
| DD                | LT                  | 61.84       | 7.44      | <b>0.017</b>             | <b>0.002</b>             |
| DD                | AT                  | 66.54       | 9.31      | <b>0.000</b>             | <b>0.023</b>             |
| DD/ <i>Ncf1</i> - | NT                  | 66.95       | 7.18      | <b>0.002</b>             | <b>0.036</b>             |
| DD/ <i>Ncf1</i> - | LT                  | 35.81       | 8.85      | <b>0.011</b>             | <b>0.000</b>             |
| DD/ <i>Ncf1</i> - | AT                  | 46.36       | 5.21      | 1.000                    | <b>0.000</b>             |
