# Supplementary material for: Reduction of NADPH-Oxidase Activity Ameliorates the Cardiovascular Phenotype in a Mouse Model of Williams-Beuren Syndrome
Source: PubMed Central journal article supplement (PMC3271062; doi:10.1371/journal.pgen.1002458), 2012-02-02
Supplement: pgen.1002458.s008.pdf [file pgen.1002458.s008.pdf]

**Table S6: Relative mRNA levels of AngII/Ren pathway genes in different tissues**

**Heart**

***Ace***

| <b>Genotype</b>   | <b>Intervention</b> | <b>Mean</b> | <b>SD</b> | <b>P vs WT</b> | <b>P vs DD</b> |
|-------------------|---------------------|-------------|-----------|----------------|----------------|
| WT                | NT                  | 1.25        | 0.24      |                |                |
| WT                | LP                  | 0.63        | 0.14      | <b>0.001</b>   |                |
| WT                | AP                  | 0.67        | 0.36      | <b>0.025</b>   |                |
| DD                | NT                  | 2.79        | 0.53      | <b>0.000</b>   |                |
| DD                | LP                  | 0.82        | 0.19      | 0.145          | <b>0.000</b>   |
| DD                | AP                  | 0.90        | 0.48      | 1.000          | <b>0.000</b>   |
| DD/ <i>Ncf1</i> - | NT                  | 2.12        | 0.65      | <b>0.028</b>   | 0.106          |
| DD/ <i>Ncf1</i> - | LP                  | 0.54        | 0.12      | 1.000          | <b>0.021</b>   |
| DD/ <i>Ncf1</i> - | AP                  | 0.78        | 0.42      | 1.000          | 1.000          |

***Agt***

| <b>Genotype</b>   | <b>Intervention</b> | <b>Mean</b> | <b>SD</b> | <b>P vs WT</b> | <b>P vs DD</b> |
|-------------------|---------------------|-------------|-----------|----------------|----------------|
| WT                | NT                  | 1.59        | 0.21      |                |                |
| WT                | LP                  | 0.48        | 0.07      | <b>0.000</b>   |                |
| WT                | AP                  | 0.76        | 0.25      | <b>0.000</b>   |                |
| DD                | NT                  | 3.66        | 0.73      | <b>0.000</b>   |                |
| DD                | LP                  | 0.42        | 0.05      | 0.398          | <b>0.000</b>   |
| DD                | AP                  | 1.53        | 0.50      | <b>0.010</b>   | <b>0.000</b>   |
| DD/ <i>Ncf1</i> - | NT                  | 2.59        | 0.39      | <b>0.007</b>   | <b>0.002</b>   |
| DD/ <i>Ncf1</i> - | LP                  | 0.39        | 0.07      | 0.066          | 1.000          |
| DD/ <i>Ncf1</i> - | AP                  | 0.96        | 0.37      | 1.000          | 0.067          |

***Ren***

| <b>Genotype</b>   | <b>Intervention</b> | <b>Mean</b> | <b>SD</b> | <b>P vs WT</b> | <b>P vs DD</b> |
|-------------------|---------------------|-------------|-----------|----------------|----------------|
| WT                | NT                  | 0.70        | 0.24      |                |                |
| WT                | LP                  | 1.44        | 0.33      | <b>0.003</b>   |                |
| WT                | AP                  | 1.16        | 0.22      | <b>0.005</b>   |                |
| DD                | NT                  | 1.63        | 0.56      | <b>0.002</b>   |                |
| DD                | LP                  | 2.89        | 0.73      | <b>0.002</b>   | <b>0.008</b>   |
| DD                | AP                  | 2.38        | 0.53      | <b>0.000</b>   | 0.158          |
| DD/ <i>Ncf1</i> - | NT                  | 0.89        | 0.28      | 1.000          | <b>0.014</b>   |
| DD/ <i>Ncf1</i> - | LP                  | 1.61        | 0.64      | 1.000          | <b>0.006</b>   |
| DD/ <i>Ncf1</i> - | AP                  | 1.41        | 0.20      | 0.760          | <b>0.001</b>   |

**Table S6: Relative mRNA levels of AngII/Ren pathway genes in different tissues**

**Aorta**

***Ace***

| <b>Genotype</b>   | <b>Intervention</b> | <b>Mean</b> | <b>SD</b> | <b>P vs WT</b> | <b>P vs DD</b> |
|-------------------|---------------------|-------------|-----------|----------------|----------------|
| WT                | NT                  | 1.52        | 0.31      |                |                |
| WT                | LP                  | 0.67        | 0.09      | <b>0.000</b>   |                |
| WT                | AP                  | 0.91        | 0.06      | <b>0.000</b>   |                |
| DD                | NT                  | 3.25        | 0.69      | <b>0.001</b>   |                |
| DD                | LP                  | 0.80        | 0.28      | 0.616          | <b>0.000</b>   |
| DD                | AP                  | 1.29        | 0.23      | <b>0.003</b>   | <b>0.000</b>   |
| DD/ <i>Ncf1</i> - | NT                  | 2.32        | 0.76      | 0.118          | 0.060          |
| DD/ <i>Ncf1</i> - | LP                  | 0.54        | 0.08      | 0.604          | 0.053          |
| DD/ <i>Ncf1</i> - | AP                  | 0.87        | 0.16      | 1.000          | <b>0.001</b>   |

***Agt***

| <b>Genotype</b>   | <b>Intervention</b> | <b>Mean</b> | <b>SD</b> | <b>P vs WT</b> | <b>P vs DD</b> |
|-------------------|---------------------|-------------|-----------|----------------|----------------|
| WT                | NT                  | 0.64        | 0.24      |                |                |
| WT                | LP                  | 0.31        | 0.07      | <b>0.034</b>   |                |
| WT                | AP                  | 0.73        | 0.29      | 1.000          |                |
| DD                | NT                  | 1.53        | 0.49      | <b>0.001</b>   |                |
| DD                | LP                  | 0.37        | 0.08      | 0.660          | <b>0.000</b>   |
| DD                | AP                  | 1.47        | 0.56      | <b>0.018</b>   | 1.000          |
| DD/ <i>Ncf1</i> - | NT                  | 1.05        | 0.15      | 0.221          | <b>0.028</b>   |
| DD/ <i>Ncf1</i> - | LP                  | 0.34        | 0.08      | 1.000          | 1.000          |
| DD/ <i>Ncf1</i> - | AP                  | 0.85        | 0.29      | 1.000          | 0.051          |

***Ren***

| <b>Genotype</b>   | <b>Intervention</b> | <b>Mean</b> | <b>SD</b> | <b>P vs WT</b> | <b>P vs DD</b> |
|-------------------|---------------------|-------------|-----------|----------------|----------------|
| WT                | NT                  | 1.28        | 0.28      |                |                |
| WT                | LP                  | 1.75        | 0.29      | 0.058          |                |
| WT                | AP                  | 1.39        | 0.29      | 1.000          |                |
| DD                | NT                  | 3.31        | 0.81      | <b>0.000</b>   |                |
| DD                | LP                  | 3.40        | 0.71      | <b>0.000</b>   | 1.000          |
| DD                | AP                  | 2.57        | 0.52      | <b>0.000</b>   | 0.248          |
| DD/ <i>Ncf1</i> - | NT                  | 1.42        | 0.30      | 1.000          | <b>0.000</b>   |
| DD/ <i>Ncf1</i> - | LP                  | 2.03        | 0.34      | 1.000          | <b>0.001</b>   |
| DD/ <i>Ncf1</i> - | AP                  | 1.47        | 0.27      | 1.000          | <b>0.000</b>   |

**Table S6: Relative mRNA levels of AngII/Ren pathway genes in different tissues**

**Lung**

***Ace***

| <b>Genotype</b>   | <b>Intervention</b> | <b>Mean</b> | <b>SD</b> | <b>P vs WT</b> | <b>P vs DD</b> |
|-------------------|---------------------|-------------|-----------|----------------|----------------|
| WT                | NT                  | 3.78        | 0.74      |                |                |
| WT                | LP                  | 2.63        | 0.14      | <b>0.000</b>   |                |
| WT                | AP                  | 3.08        | 0.24      | 0.056          |                |
| DD                | NT                  | 8.66        | 1.14      | <b>0.000</b>   |                |
| DD                | LP                  | 3.66        | 0.35      | <b>0.000</b>   | <b>0.000</b>   |
| DD                | AP                  | 4.90        | 0.48      | <b>0.000</b>   | <b>0.000</b>   |
| DD/ <i>Ncf1</i> - | NT                  | 6.44        | 1.19      | <b>0.002</b>   | <b>0.007</b>   |
| DD/ <i>Ncf1</i> - | LP                  | 2.54        | 0.12      | 1.000          | <b>0.000</b>   |
| DD/ <i>Ncf1</i> - | AP                  | 4.67        | 0.51      | <b>0.000</b>   | 1.000          |

***Agt***

| <b>Genotype</b>   | <b>Intervention</b> | <b>Mean</b> | <b>SD</b> | <b>P vs WT</b> | <b>P vs DD</b> |
|-------------------|---------------------|-------------|-----------|----------------|----------------|
| WT                | NT                  | 1.73        | 0.21      |                |                |
| WT                | LP                  | 0.62        | 0.14      | <b>0.000</b>   |                |
| WT                | AP                  | 1.46        | 0.12      | 0.320          |                |
| DD                | NT                  | 3.90        | 1.09      | <b>0.000</b>   |                |
| DD                | LP                  | 0.61        | 0.17      | 1.000          | <b>0.000</b>   |
| DD                | AP                  | 2.99        | 0.42      | <b>0.001</b>   | <b>0.037</b>   |
| DD/ <i>Ncf1</i> - | NT                  | 2.93        | 0.17      | <b>0.009</b>   | <b>0.022</b>   |
| DD/ <i>Ncf1</i> - | LP                  | 0.57        | 0.22      | 1.000          | 1.000          |
| DD/ <i>Ncf1</i> - | AP                  | 2.16        | 0.82      | 0.115          | 0.054          |

***Ren***

| <b>Genotype</b>   | <b>Intervention</b> | <b>Mean</b> | <b>SD</b> | <b>P vs WT</b> | <b>P vs DD</b> |
|-------------------|---------------------|-------------|-----------|----------------|----------------|
| WT                | NT                  | 0.45        | 0.11      |                |                |
| WT                | LP                  | 0.24        | 0.07      | <b>0.000</b>   |                |
| WT                | AP                  | 0.59        | 0.22      | 1.000          |                |
| DD                | NT                  | 1.14        | 0.26      | <b>0.000</b>   |                |
| DD                | LP                  | 0.51        | 0.07      | <b>0.000</b>   | <b>0.006</b>   |
| DD                | AP                  | 1.16        | 1.30      | <b>0.000</b>   | 0.077          |
| DD/ <i>Ncf1</i> - | NT                  | 0.62        | 0.24      | 0.576          | <b>0.002</b>   |
| DD/ <i>Ncf1</i> - | LP                  | 0.20        | 0.05      | 0.878          | <b>0.000</b>   |
| DD/ <i>Ncf1</i> - | AP                  | 0.67        | 0.67      | 1.000          | <b>0.001</b>   |

**Table S6: Relative mRNA levels of AngII/Ren pathway genes in different tissues**

**Kidney**

***Ren***

| <b>Genotype</b>   | <b>Intervention</b> | <b>Mean</b> | <b>SD</b> | <b>P vs WT</b> | <b>P vs DD</b> |
|-------------------|---------------------|-------------|-----------|----------------|----------------|
| WT                | NT                  | 0.76        | 0.18      |                |                |
| DD                | NT                  | 3.27        | 0.33      | <b>0.000</b>   |                |
| DD/ <i>Ncf1</i> - | NT                  | 0.74        | 0.05      | 0.802          | <b>0.000</b>   |
