# Supplementary material for: Reduction of NADPH-Oxidase Activity Ameliorates the Cardiovascular Phenotype in a Mouse Model of Williams-Beuren Syndrome
Source: PubMed Central journal article supplement (PMC3271062; doi:10.1371/journal.pgen.1002458), 2012-02-02
Supplement: pgen.1002458.s009.pdf [file pgen.1002458.s009.pdf]

**Table S7: Quantification of protein nitrosylation and DHE fluorescence in aortic wall**

**Protein nitrosylation**

| Genotype          | Intervention | Mean      | SD       | P vs WT-NT   | P vs DD      |
|-------------------|--------------|-----------|----------|--------------|--------------|
| WT                | NT           | 16,384.05 | 3,378.25 |              |              |
| DD                | NT           | 23,446.04 | 7,157.71 | <b>0.000</b> |              |
| DD/ <i>Ncf1</i> - | NT           | 8,579.32  | 3,844.15 | <b>0.000</b> | <b>0.000</b> |

**ROS production**

| Genotype          | Intervention | Mean      | SD       | Relative Values | P vs WT      | P vs DD      |
|-------------------|--------------|-----------|----------|-----------------|--------------|--------------|
| WT                | NT           | 12,750.72 | 4,293.92 | 1.00            |              |              |
| WT                | LP           | 9,116.88  | 6,026.33 | 0.72            |              |              |
| WT                | LN           | 4,476.72  | 3,517.27 | 0.35            |              |              |
| WT                | AP           | 6,186.58  | 3,498.34 | 0.49            |              |              |
| WT                | AN           | 5,968.12  | 2,057.29 | 0.47            |              |              |
| DD                | NT           | 17,043.07 | 5,574.25 | 1.34            | <b>0.001</b> |              |
| DD                | LP           | 13,314.86 | 3,774.84 | 1.04            | 0.644        | <b>0.017</b> |
| DD                | LN           | 6,761.91  | 3,062.31 | 0.53            | <b>0.000</b> | <b>0.000</b> |
| DD                | AP           | 9,126.90  | 3,717.63 | 0.72            | <b>0.010</b> | <b>0.000</b> |
| DD                | AN           | 11,597.32 | 4,440.65 | 0.91            | 0.370        | <b>0.000</b> |
| DD/ <i>Ncf1</i> - | NT           | 6,688.86  | 2,768.13 | 0.52            | <b>0.000</b> | <b>0.000</b> |
| DD/ <i>Ncf1</i> - | LP           | 5,475.40  | 1,890.57 | 0.43            | <b>0.000</b> | <b>0.000</b> |
| DD/ <i>Ncf1</i> - | LN           | 2,777.75  | 1,369.01 | 0.22            | <b>0.000</b> | <b>0.000</b> |
| DD/ <i>Ncf1</i> - | AP           | 3,219.99  | 1,492.19 | 0.25            | <b>0.000</b> | <b>0.000</b> |
| DD/ <i>Ncf1</i> - | AN           | 3,252.79  | 1,119.66 | 0.26            | <b>0.000</b> | <b>0.000</b> |
