# Supplementary material for: Reduction of NADPH-Oxidase Activity Ameliorates the Cardiovascular Phenotype in a Mouse Model of Williams-Beuren Syndrome
Source: PubMed Central journal article supplement (PMC3271062; doi:10.1371/journal.pgen.1002458), 2012-02-02
Supplement: pgen.1002458.s010.pdf [file pgen.1002458.s010.pdf]

**Table S8: Relative mRNA levels of oxidative stress molecules in heart, aorta and lung****Heart*****Ncf1***

| <b>Genotype</b>   | <b>Intervention</b> | <b>Mean</b> | <b>SD</b> | <b>P vs WT</b> | <b>P vs DD</b> |
|-------------------|---------------------|-------------|-----------|----------------|----------------|
| DD                | NT                  | 2.74        | 0.37      | <b>0.000</b>   |                |
| DD                | LT                  | 0.57        | 0.06      | <b>0.000</b>   | <b>0.000</b>   |
| DD                | AT                  | 0.95        | 0.18      | 0.377          | <b>0.002</b>   |
| DD/ <i>Ncf1</i> - | NT                  | 1.10        | 0.03      | 1.000          | <b>0.000</b>   |
| PD                | NT                  | 0.70        | 0.05      | 0.346          | <b>0.000</b>   |
| D/P               | NT                  | 1.95        | 0.35      | <b>0.000</b>   | <b>0.017</b>   |

***Ncf2***

| <b>Genotype</b>   | <b>Intervention</b> | <b>Mean</b> | <b>SD</b> | <b>P vs WT</b> | <b>P vs DD</b> |
|-------------------|---------------------|-------------|-----------|----------------|----------------|
| DD                | NT                  | 1.92        | 0.20      | <b>0.000</b>   |                |
| DD                | LT                  | 0.82        | 0.02      | <b>0.000</b>   | <b>0.000</b>   |
| DD                | AT                  | 0.69        | 0.10      | <b>0.000</b>   | <b>0.000</b>   |
| DD/ <i>Ncf1</i> - | NT                  | 0.73        | 0.10      | <b>0.003</b>   | <b>0.000</b>   |
| PD                | NT                  | 1.10        | 0.13      | 0.737          | <b>0.000</b>   |
| D/P               | NT                  | 0.72        | 0.05      | <b>0.000</b>   | <b>0.000</b>   |

***Nox2/Cybb***

| <b>Genotype</b>   | <b>Intervention</b> | <b>Mean</b> | <b>SD</b> | <b>P vs WT</b> | <b>P vs DD</b> |
|-------------------|---------------------|-------------|-----------|----------------|----------------|
| DD                | NT                  | 1.99        | 0.19      | <b>0.000</b>   |                |
| DD                | LT                  | 1.10        | 0.07      | <b>0.004</b>   | <b>0.030</b>   |
| DD                | AT                  | 1.67        | 0.04      | <b>0.000</b>   | 0.127          |
| DD/ <i>Ncf1</i> - | NT                  | 1.28        | 0.07      | 0.232          | <b>0.005</b>   |
| PD                | NT                  | 1.13        | 0.09      | 1.000          | <b>0.000</b>   |
| D/P               | NT                  | 1.95        | 0.29      | <b>0.000</b>   | 1.000          |

***Nox4***

| <b>Genotype</b>   | <b>Intervention</b> | <b>Mean</b> | <b>SD</b> | <b>P vs WT</b> | <b>P vs DD</b> |
|-------------------|---------------------|-------------|-----------|----------------|----------------|
| DD                | NT                  | 2.72        | 0.28      | <b>0.002</b>   |                |
| DD                | LT                  | 0.91        | 0.07      | <b>0.008</b>   | <b>0.000</b>   |
| DD                | AT                  | 2.15        | 0.21      | <b>0.000</b>   | 0.062          |
| DD/ <i>Ncf1</i> - | NT                  | 0.78        | 0.08      | <b>1.000</b>   | <b>0.027</b>   |
| PD                | NT                  | 1.10        | 0.24      | 1.000          | <b>0.028</b>   |
| D/P               | NT                  | 1.35        | 0.76      | 1.000          | 0.060          |

***Cyba***

| <b>Genotype</b>   | <b>Intervention</b> | <b>Mean</b> | <b>SD</b> | <b>P vs WT</b> | <b>P vs DD</b> |
|-------------------|---------------------|-------------|-----------|----------------|----------------|
| DD                | NT                  | 1.15        | 0.14      | 1.000          |                |
| DD                | LT                  | 0.80        | 0.05      | 0.084          | <b>0.015</b>   |
| DD                | AT                  | 1.04        | 0.08      | 0.106          | 0.724          |
| DD/ <i>Ncf1</i> - | NT                  | 0.64        | 0.02      | 0.280          | 0.102          |
| PD                | NT                  | 1.12        | 0.27      | 1.000          | 1.000          |
| D/P               | NT                  | 1.52        | 0.31      | <b>0.002</b>   | 0.303          |

***Rac2***

| <b>Genotype</b>   | <b>Intervention</b> | <b>Mean</b> | <b>SD</b> | <b>P vs WT</b> | <b>P vs DD</b> |
|-------------------|---------------------|-------------|-----------|----------------|----------------|
| DD                | NT                  | 1.32        | 0.12      | <b>0.000</b>   |                |
| DD                | LT                  | 0.96        | 0.10      | 0.246          | <b>0.013</b>   |
| DD                | AT                  | 1.27        | 0.07      | <b>0.000</b>   | 1.000          |
| DD/ <i>Ncf1</i> - | NT                  | 1.11        | 0.08      | 0.069          | 0.069          |

**Table S8: Relative mRNA levels of oxidative stress molecules in heart, aorta and lung****Aorta*****Ncf1***

| <b>Genotype</b> | <b>Intervention</b> | <b>Mean</b> | <b>SD</b> | <b>P vs WT</b> | <b>P vs DD</b> |
|-----------------|---------------------|-------------|-----------|----------------|----------------|
| DD              | NT                  | 2.34        | 0.18      | <b>0.000</b>   |                |
| PD              | NT                  | 0.76        | 0.14      | 0.068          | <b>0.000</b>   |
| D/P             | NT                  | 1.62        | 0.13      | <b>0.002</b>   | <b>0.003</b>   |

***Ncf2***

| <b>Genotype</b> | <b>Intervention</b> | <b>Mean</b> | <b>SD</b> | <b>P vs WT</b> | <b>P vs DD</b> |
|-----------------|---------------------|-------------|-----------|----------------|----------------|
| DD              | NT                  | 1.78        | 0.07      | <b>0.002</b>   |                |
| PD              | NT                  | 0.86        | 0.14      | 0.100          | <b>0.004</b>   |
| D/P             | NT                  | 0.96        | 0.17      | 0.762          | <b>0.026</b>   |

***Nox2/Cybb***

| <b>Genotype</b> | <b>Intervention</b> | <b>Mean</b> | <b>SD</b> | <b>P vs WT</b> | <b>P vs DD</b> |
|-----------------|---------------------|-------------|-----------|----------------|----------------|
| DD              | NT                  | 1.81        | 0.03      | <b>0.011</b>   |                |
| PD              | NT                  | 1.03        | 0.02      | 0.770          | <b>0.000</b>   |
| D/P             | NT                  | 1.94        | 0.12      | <b>0.002</b>   | 0.258          |

***Nox4***

| <b>Genotype</b> | <b>Intervention</b> | <b>Mean</b> | <b>SD</b> | <b>P vs WT</b> | <b>P vs DD</b> |
|-----------------|---------------------|-------------|-----------|----------------|----------------|
| DD              | NT                  | 2.52        | 0.02      | <b>0.000</b>   |                |
| PD              | NT                  | 1.04        | 0.11      | 0.701          | <b>0.001</b>   |
| D/P             | NT                  | 1.62        | 0.21      | <b>0.028</b>   | <b>0.016</b>   |

***Cyba***

| <b>Genotype</b> | <b>Intervention</b> | <b>Mean</b> | <b>SD</b> | <b>P vs WT</b> | <b>P vs DD</b> |
|-----------------|---------------------|-------------|-----------|----------------|----------------|
| DD              | NT                  | 1.03        | 0.10      | 0.233          |                |
| PD              | NT                  | 0.99        | 0.07      | 0.911          | 0.371          |
| D/P             | NT                  | 1.33        | 0.08      | <b>0.032</b>   | <b>0.006</b>   |

**Table S8: Relative mRNA levels of oxidative stress molecules in heart, aorta and lung****Lung*****Ncf1***

| <b>Genotype</b> | <b>Intervention</b> | <b>Mean</b> | <b>SD</b> | <b>P vs WT</b> | <b>P vs DD</b> |
|-----------------|---------------------|-------------|-----------|----------------|----------------|
| DD              | NT                  | 2.71        | 0.23      | <b>0.000</b>   |                |
| PD              | NT                  | 0.69        | 0.01      | <b>0.010</b>   | <b>0.000</b>   |
| D/P             | NT                  | 1.75        | 0.34      | <b>0.021</b>   | <b>0.014</b>   |

***Ncf2***

| <b>Genotype</b> | <b>Intervention</b> | <b>Mean</b> | <b>SD</b> | <b>P vs WT</b> | <b>P vs DD</b> |
|-----------------|---------------------|-------------|-----------|----------------|----------------|
| DD              | NT                  | 1.86        | 0.24      | <b>0.018</b>   |                |
| PD              | NT                  | 1.02        | 0.11      | 0.824          | <b>0.042</b>   |
| D/P             | NT                  | 1.02        | 0.07      | 0.223          | <b>0.016</b>   |

***Nox2/Cybb***

| <b>Genotype</b> | <b>Intervention</b> | <b>Mean</b> | <b>SD</b> | <b>P vs WT</b> | <b>P vs DD</b> |
|-----------------|---------------------|-------------|-----------|----------------|----------------|
| DD              | NT                  | 2.40        | 0.14      | <b>0.004</b>   |                |
| PD              | NT                  | 1.10        | 0.02      | 0.111          | <b>0.004</b>   |
| D/P             | NT                  | 2.07        | 0.36      | <b>0.045</b>   | 0.285          |

***Nox4***

| <b>Genotype</b> | <b>Intervention</b> | <b>Mean</b> | <b>SD</b> | <b>P vs WT</b> | <b>P vs DD</b> |
|-----------------|---------------------|-------------|-----------|----------------|----------------|
| DD              | NT                  | 2.21        | 0.29      | <b>0.003</b>   |                |
| PD              | NT                  | 0.95        | 0.11      | 0.622          | <b>0.012</b>   |
| D/P             | NT                  | 1.63        | 0.15      | 0.094          | 0.149          |

***Cyba***

| <b>Genotype</b> | <b>Intervention</b> | <b>Mean</b> | <b>SD</b> | <b>P vs WT</b> | <b>P vs DD</b> |
|-----------------|---------------------|-------------|-----------|----------------|----------------|
| DD              | NT                  | 1.58        | 0.13      | <b>0.018</b>   |                |
| PD              | NT                  | 0.95        | 0.10      | 0.623          | <b>0.005</b>   |
| D/P             | NT                  | 0.99        | 0.02      | 0.923          | <b>0.013</b>   |
