# Supplementary material for: Reduction of NADPH-Oxidase Activity Ameliorates the Cardiovascular Phenotype in a Mouse Model of Williams-Beuren Syndrome
Source: PubMed Central journal article supplement (PMC3271062; doi:10.1371/journal.pgen.1002458), 2012-02-02
Supplement: pgen.1002458.s011.pdf [file pgen.1002458.s011.pdf]

**Table S9: Secondary effects of pharmacological treatments**

**Prenatal outcomes (birth rates) after pharmacological intervention**

| <b>Intervention</b> | <b>N° of crosses</b> | <b>Pups number</b> | <b>pups / cross</b> |
|---------------------|----------------------|--------------------|---------------------|
| <b>NT</b>           | 16.00                | 57.00              | 3.56                |
| <b>LP</b>           | 35.00                | 85.00              | 2.43                |
| <b>AP</b>           | 24.00                | 79.00              | 3.29                |
| <b>Expected</b>     | <b>Observed</b>      | <b>%</b>           |                     |
| 124.69              | 85.00                | 68.17              |                     |
| 85.50               | 79.00                | 92.40              |                     |
| <b>Intervention</b> | <b>Mean</b>          | <b>SD</b>          | <b>P</b>            |
| <b>NT</b>           | 3.80                 | 1.15               |                     |
| <b>LP</b>           | 2.50                 | 1.33               | <b>0.00</b>         |
| <b>AP</b>           | 3.43                 | 1.44               | 0.41                |

NT: no treatment; LP: losartan prenatal; AP: apocynin prenatal

**Premature postnatal deaths after prenatal treatment with losartan**

| <b>Genotypes</b>  | <b>Total N°</b> | <b>N° of Premature Death</b> |
|-------------------|-----------------|------------------------------|
| WT                | 20              | 3                            |
| DD                | 20              | 4                            |
| DD/ <i>Ncf1</i> - | 14              | 2                            |
