# Supplementary material for: Reduction of NADPH-Oxidase Activity Ameliorates the Cardiovascular Phenotype in a Mouse Model of Williams-Beuren Syndrome
Source: PubMed Central journal article supplement (PMC3271062; doi:10.1371/journal.pgen.1002458), 2012-02-02
Supplement: pgen.1002458.s012.pdf [file pgen.1002458.s012.pdf]

**Table S10: Primer sequences and PCR conditions for qRT-PCR and genotyping**

**qRT-PCR**

| <b>Gene name</b> | <b>Sequence (5'→3')</b> | <b>Amplicon size</b> | <b>Location</b> | <b>Tm</b> |
|------------------|-------------------------|----------------------|-----------------|-----------|
| <i>Rps28</i>     | TAGGGTAACCAAAGTGCTGGGC  | 104                  | exon 1-2        | 64.49     |
|                  | GACATTTTCGGATGATAGAGCGG |                      | exon 3          | 63.02     |
| <i>Ace</i>       | GCCATCCTTCCTTTTTTCCCA   | 181                  | exon 16         | 64.45     |
|                  | GCACATAGGCATGCAGGTTCA   |                      | exon17          | 64.38     |
| <i>Agt</i>       | TGTGACAGGGTGGAAAGATGA   | 116                  | exon 1          | 60.09     |
|                  | CAGGCAGCTGAGAGAAACCT    |                      | exon 2          | 59.75     |
| <i>Ren</i>       | CTCCTGGCAGATCACGATGAA   | 161                  | exon 6          | 63.62     |
|                  | TTCTCTTCTCCTTGGCTCCCA   |                      | exon 7          | 63.54     |
| <i>Ncf1</i>      | TCCCTGCATCCTATCTGGAG    | 169                  | exon 7          | 60.17     |
|                  | TCCAGGAGCTTATGAATGACC   |                      | exon 8          | 59.14     |
| <i>Ncf2</i>      | CCGACAAGAAGGACTGGAAG    | 219                  | exon 1          | 59.84     |
|                  | CAAGGTCGTACTTCTCCATTCTG |                      | exon 2-3        | 60.17     |
| <i>Nox2/Cybb</i> | CATCGGTGACAATGAGAACG    | 229                  | exon 5          | 60.11     |
|                  | AAGGCCGATGAAGAAGATCA    |                      | exon 6          | 59.77     |
| <i>Nox4</i>      | ATCTTTGCCTCGAGGGTTTT    | 182                  | exon 9          | 60.07     |
|                  | TGACAGGTTTGTGCTCCTG     |                      | exon 10         | 59.87     |
| <i>Cyba</i>      | AGATCGAGTGGGCCATGT      | 102                  | exon 1          | 59.00     |
|                  | ACCACTGTGTGAAACGTCCA    |                      | exon2           | 60.00     |
| <i>Rac2</i>      | AACGCCTTCCCTGGAGAATA    | 150                  | exon 2          | 60.95     |
|                  | TGTCTGTGGGTAGGAGAGTGG   |                      | exon 3          | 60.16     |
| <i>Ein</i>       | TCCCGGTGGAGTCTATTATCC   | 92                   | exon 2          | 60.16     |
|                  | CTGGCTTAGGTGGTTTTCTC    |                      | exon 4          | 60.12     |

| <b>qRT-PCR Conditions</b> | <b>Final volume 10 µl</b>              |
|---------------------------|----------------------------------------|
| Stage 1                   | 50°-2 min                              |
| Stage 2                   | 95°-10 min                             |
| Stage 3                   | (95°-30 sec; 58°-30 sec; 72°-30sec)X40 |
| Stage 4                   | 72°- 7 min                             |
| Dissociation stage        | 95°-15 sec; 60°-15sec; 95°-15sec       |

**Genotyping**

| <b>Locus</b> | <b>Sequence (5'→3')</b> | <b>Amplicon size</b> |
|--------------|-------------------------|----------------------|
| <i>Ncf1</i>  | TGGAAGAAGCTGAGAGTTGAGG  | 160                  |
|              | TCCAGGAGCTTATGAATGACC   |                      |
| DD deletion  | AGAAGGTCCACCAGCTCAGT    | 458                  |
|              | TTTCTGTGGGGCAAATGTA     |                      |
| PD deletion  | TTTCTGTGGGGCAAATGTA     | 352                  |
|              | AACAGCCTGCCAACTTCTTT    |                      |
