# Supplementary material for: Reduction of NADPH-Oxidase Activity Ameliorates the Cardiovascular Phenotype in a Mouse Model of Williams-Beuren Syndrome
Source: PubMed Central journal article supplement (PMC3271062; doi:10.1371/journal.pgen.1002458), 2012-02-02
Supplement: pgen.1002458.s013.pdf [file pgen.1002458.s013.pdf]

**Table S11: Recording of drinking volumes**

| <b>Intervention</b> | <b>Mean</b> | <b>SD</b> | <b><i>P</i></b> |
|---------------------|-------------|-----------|-----------------|
| <b>NT</b>           | 3.97        | 0.31      |                 |
| <b>LN</b>           | 4.15        | 0.07      | 0.20            |
| <b>AN</b>           | 3.96        | 0.13      | 0.96            |
